# Supplementary material
Source: PubMed Central journal article supplement (PMC4384836)
Supplement: sb500195w_si_001.pdf [file sb500195w_si_001.pdf]

# Supporting Information

## Table of Contents

- I. Primers..... 2
  - 1. For library construction..... 2
  - 2. For mutation transfer..... 2
  
- II. Additional data
  - 1. Figure S1..... 3
  - 2. Figure S2..... 4
  - 3. Figure S3..... 5
  - 4. Figure S4..... 6

## I. Primers

1. For library construction.

### **pBK-TyrRS-Nde1-F1**

TTGAGGAATCCCATATGGACGA

### **TyrRS-Lib1-R1**

CAATTCCTTATTTTTAAATAA

### **TyrRS-Lib1-F2**

TTATTTAAAAATAAGGAATTGNNKCCANNKNNKTTAAAAAATGCTGTAGCTGAAG

### **TyrRS-Lib1-R2**

GCGAACGCCTTATCCGGCCTG

### **TyrRS-F261-R**

TTTTTCTGGCCTTTTTATGGT

### **TyrRS-F261-F**

ACCATAAAAAGGCCAGAAAAANNKGGTGGAGATTTGACAGTTAATA

### **pBK-wtAcF-D286R-F2**

AAAAATAAGGAATTGCATCCAATGCGCTTAAAAAATGCTG

2. For mutation transfer

TTGAGGAATCCCATATGGACGA

CTCCATCCCTCCAACAGC

GCTGTTGGAGGGATGGAG

GCGAACGCCTTATCCGGCCTG

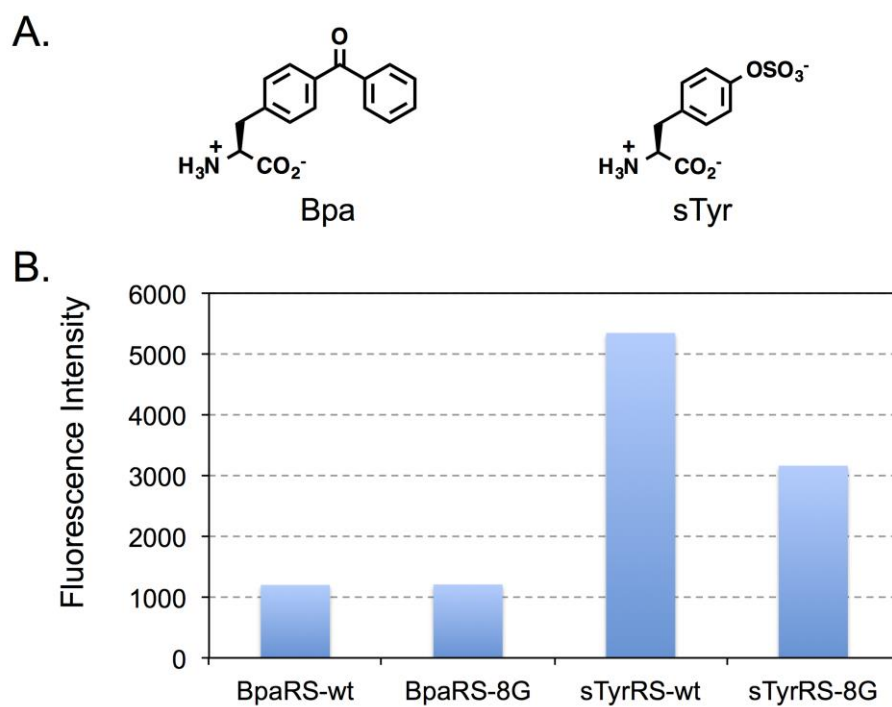

**Figure S1.** GFP fluorescence assays of cells expressing BpaRS and sTyrRS variants that contain anticodon recognition region mutations from AcPheRS-8G.

(A) The structures of *p*-benzoyl-L-phenylalanine (Bpa) and sulfotyrosine (sTyr); (B) Fluorescence readings of *E. coli* GeneHogs cells expressing BpaRS and sTyrRS variants, each co-expressed with  $MjtRNA_{CUA}^{Tyr}$ , in the presence of 1 mM Bpa and 10 mM sTyr, respectively. Fluorescence intensity was normalized to cell growth.

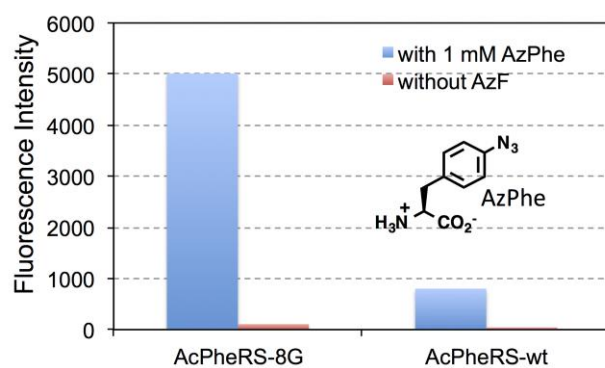

**Figure S2.** GFP fluorescence assays of AzPhe incorporation by AcPheRS-wt and AcPheRS-8G. Fluorescence readings of *E. coli* GeneHogs cells expressing AcPheRS-wt and AcPheRS-8G, each co-expressed with  $MjtRNA_{CUA}^{Tyr}$ , in the presence or the absence of 1 mM AzPhe. Fluorescence intensity was normalized to cell growth.

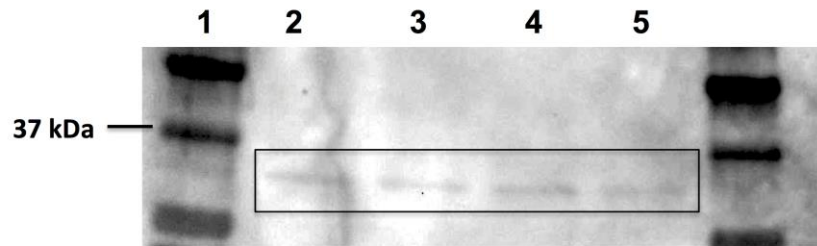

**Figure S3.** Western blot analysis of protein expression level. Lane 1, marker; lane 2, AcPheRS-8G; lane 3, AcPheRS-8G; lane 4, AcPheRS-wt; lane 5, AcPheRS-wt.

The AcPheRS-8G and AcPheRS-wt were sub-cloned and expressed as C-terminus His<sub>6</sub> fusion proteins. Each sample lane was normalized to the same number of cells based on OD<sub>600nm</sub> measurement. Protein expression experiments were conducted as duplicates for each protein. The protein bands were visualized immunochemically using anti-His antibody and HRP-labeled secondary antibody. No significant differences in protein expression level were observed between AcPheRS-8G and AcPheRS-wt.

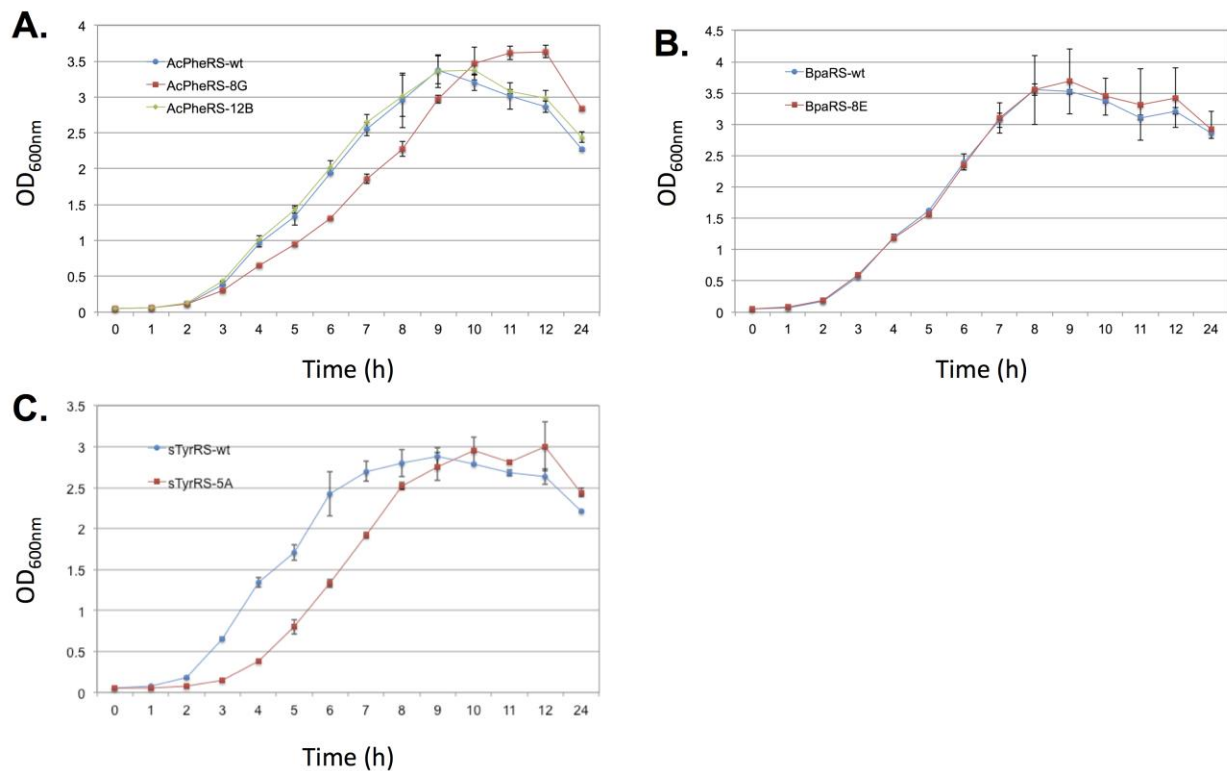

**Figure S4.** Growth rate of *E. coli* cells that contain different *MjTyrRS* variants.

Data are the average of three experiments.

Note. Similar cell growth rates of strains harboring different AcPheRS variants were observed. It is therefore unlikely that the evolved aminoacyl-tRNA synthetase mutants mis-aminoacylate endogenous tRNAs at detectable higher level than their parent aminoacyl-tRNA synthetases. Otherwise, stronger cell growth inhibition would be observed in the presence of the evolved aminoacyl-tRNA synthetase mutants.
